# Supplementary material for: Lessons learned in applying the International Society for Pharmacoeconomics and Outcomes Research methodology to translating Canadian Emergency Department Information System Presenting Complaints List into German
Source: PubMed Central journal article supplement — Eur J Emerg Med. 2017 Mar 6;25(4):295–9. doi: 10.1097/MEJ.0000000000000450 (PMC6039420; doi:10.1097/mej.0000000000000450), 2017-03-06
Supplement: mej-25-295-s001.pdf [file mej-25-295-s001.pdf]

## Project Translating CEDIS Presenting Complaint List

| Personal Details and Workplace                                                                                                                                                                                                                   |       |
|--------------------------------------------------------------------------------------------------------------------------------------------------------------------------------------------------------------------------------------------------|-------|
| Occupation/Training:                                                                                                                                                                                                                             |       |
| Job description:                                                                                                                                                                                                                                 |       |
| Experience in Emergency Medicine:                                                                                                                                                                                                                | Years |
| Specific experience in Triage:                                                                                                                                                                                                                   | Years |
| Specific Qualification or Training Course for Triage?                                                                                                                                                                                            |       |
| Age:                                                                                                                                                                                                                                             |       |
| Sex:                                                                                                                                                                                                                                             |       |
| Level of care provided at your hospital:                                                                                                                                                                                                         |       |
| Type of Emergency Department: <ul style="list-style-type: none"><li>• Interdisciplinary or Specialty-specific (eg Trauma, Medical, Pediatric):</li><li>• Approximate patient numbers per year:</li><li>• Number of resuscitation bays:</li></ul> |       |
| Do the patients undergo a Triage assessment?                                                                                                                                                                                                     |       |
| If yes, which system do you use (eg MTS or ESI)?                                                                                                                                                                                                 |       |



## Project Translating CEDIS Presenting Complaint List

### 2. Step:

The following are 10 examples of men or women, presenting or brought to the Emergency Department. Please read through the examples and ascribe a presenting complaint from the list to them.

#### **Scenario 1:**

A 45-year-old male arrives with vital signs absent. He was snowblowing when he collapsed. Cardiopulmonary resuscitation (CPR) is in progress, he has been intubated, and he is receiving advanced care for ventricular fibrillation.

Presenting complaint: \_\_\_\_\_

#### **Scenario 2:**

A 20-year-old female arrives with left ankle pain for 1 day. She everted her ankle when she was walking. Pain is 4/10. She is weight bearing on the ankle.

Presenting complaint: \_\_\_\_\_

#### **Scenario 3:**

A 50-year-old female arrives with cough and fever for 1 week. She is on atorvastatin (Lipitor), has no allergies, and has a past history of pneumonia. She is a smoker; there is no chest pain.

Presenting complaint: \_\_\_\_\_

#### **Fallbeispiel 4:**

A 20-year-old male arrives with dental pain for 2 days. He is on ibuprofen and has no allergies. There has been no fever, swelling, or drainage. Pain is 4/10. Vital signs are temperature 37°C (98.6°F), heart rate 80 beats/minute, blood pressure 110/70 mm Hg, and respiratory rate 16 breaths/minute.

Presenting complaint: \_\_\_\_\_

## Project Translating CEDIS Presenting Complaint List

### Fallbeispiel 5:

A 30-year-old male arrives with left flank pain for 1 hour. He has had renal colic three times previously. He has vomited twice. There is no fever, no dysuria, and no frequency. He is on no medications and has no allergies. Pain is 6/10. Vital signs are temperature 37°C (98.6°F), heart rate 90 beats/minute, blood pressure 120/90 mm Hg, and respiratory rate 16 breaths/minute.

Presenting complaint: \_\_\_\_\_

### Scenario 6:

A 20-year-old female is suicidal for 1 day. She has a past history of psychiatric hospitalization for depression. There is no other relevant medical history. She is on paroxetine (Paxil) and has no allergies. She has a plan for hanging herself. She is a smoker and takes no street drugs or alcohol. Vital signs are temperature 37°C (98.6°F), heart rate 90 beats/minute, blood pressure 110/90 mm Hg, and respiratory rate 18 breaths/minute. She has poor eye contact. She is oriented, with no signs of intoxication.

Presenting complaint: \_\_\_\_\_

### Scenario 7:

A 55-year-old male arrives with left chest pain for 1 hour, radiating to the left arm. He has had a previous myocardial infarction and a history of dyslipidemia and hypertension. He is on nitroglycerin, aspirin, atorvastatin, and ramipril. He has no allergies. His pain is 7/10. He has vomited twice and got some relief from nitroglycerin given twice in the ambulance. Vital signs are temperature 36.5°C (97.7°F), heart rate 60 beats/minute, blood pressure 140/90 mm Hg, and respiratory rate 20 breaths/minute. Bibasal crackles are heard in his lung fields.

Presenting complaint: \_\_\_\_\_

### Scenario 8:

A 25-year-old female arrives with mild vaginal bleeding for 2 hours. She has also had lower abdominal cramps. She is 6 weeks pregnant. She takes no medications and has no allergies. She has 4/10 pain. Vital signs are temperature 37°C (98.6°F), heart rate 100 beats/minute, blood pressure 120/80 mm Hg, and respiratory rate 16 breaths/minute.

Presenting complaint: \_\_\_\_\_

## Project Translating CEDIS Presenting Complaint List

### Scenario 9:

A 30-year-old male arrives with left hip pain for 1 hour. He fell off his snowmobile and hit a tree. He is on no medication and has no allergies. He has no previous medical or surgical history. His pain is 6/10. Vital signs are temperature 37.2uC (98.9uF), heart rate 100 beats/minute, blood pressure 130/90 mm Hg, and respiratory rate 20 breaths/minute. His left hip is internally rotated and flexed. He has good pulses and sensation, with limited range of motion.

Presenting complaint: \_\_\_\_\_

### Scenario 10:

A 16-year-old male arrives with fever for 4 hours. He has a history of leukemia and is on chemotherapy. He has no cough, no chest pain, no abdominal pain, no vomiting, no diarrhea, no dysuria, and no frequency. He has no allergies. Vital signs are temperature 39.5uC (103.1uF), heart rate 120 beats/ minute, respiratory rate 20 breaths/minute, and blood pressure 110/70 mm Hg.

Presenting complaint: \_\_\_\_\_

**Project Translating CEDIS Presenting Complaint List**

| <b>Further comments</b>                                                                                                                                                       |
|-------------------------------------------------------------------------------------------------------------------------------------------------------------------------------|
| <p>Do you have further comments or a more precise expression should the relevant presenting complaint fail? If so note them here.</p><br><br><br><br><br><br><br><br><br><br> |

| <b>Overall impression</b>                             |                          |                          |                          |                          |
|-------------------------------------------------------|--------------------------|--------------------------|--------------------------|--------------------------|
| Do you consider the list in its current form helpful? |                          |                          |                          |                          |
| Fully agree                                           | Partly agree             | Undecided                | Partly disagree          | Completely disagree      |
| <input type="checkbox"/>                              | <input type="checkbox"/> | <input type="checkbox"/> | <input type="checkbox"/> | <input type="checkbox"/> |
| <p>Why?</p><br><br><br><br><br><br><br><br><br><br>   |                          |                          |                          |                          |

**Thank you for your assistance!**
