# Supplementary material for: Lessons learned in applying the International Society for Pharmacoeconomics and Outcomes Research methodology to translating Canadian Emergency Department Information System Presenting Complaints List into German
Source: PubMed Central journal article supplement — Eur J Emerg Med. 2017 Mar 6;25(4):295–9. doi: 10.1097/MEJ.0000000000000450 (PMC6039420; doi:10.1097/mej.0000000000000450), 2017-03-06
Supplement: mej-25-295-s003.pdf [file mej-25-295-s003.pdf]

| Canadian Emergency Department Information System (CEDIS)             |          |                                              |          |                                                                    |          |
|----------------------------------------------------------------------|----------|----------------------------------------------|----------|--------------------------------------------------------------------|----------|
| Liste der Vorstellungsgründe (V3.0)                                  |          |                                              |          |                                                                    |          |
| Stand des Originals: April 2015, Stand der Übersetzung: Februar 2016 |          |                                              |          |                                                                    |          |
|                                                                      |          |                                              |          |                                                                    |          |
| <b>Kardiovaskulär (001-050)</b>                                      | <b>#</b> | <b>Umweltbedingt (201-250)</b>               | <b>#</b> | <b>Urogenital (301-350) (Forts.)</b>                               | <b>#</b> |
| Herzstillstand (nicht traumatisch)                                   | 001      | Erfrierung/Kälteverletzung                   | 201      | Polyurie                                                           | 309      |
| Herzstillstand (traumatisch)                                         | 002      | Schädliche Inhalation                        | 202      | Trauma genital                                                     | 310      |
| Brustschmerz (kardial)                                               | 003      | Stromunfall                                  | 203      | <b>Psychische Verfassung (351-400)</b>                             | <b>#</b> |
| Brustschmerz (nicht kardial)                                         | 004      | Exposition gegenüber Chemikalien             | 204      | Depression/Suizidalität/absichtliche Selbstschädigung              | 351      |
| Palpitationen/unregelmäßiger Herzschlag                              | 005      | Unterkühlung                                 | 205      | Angst/situationsbezogene Krise                                     | 352      |
| Hypertonie                                                           | 006      | Beinahe-Ertrinken                            | 206      | Halluzinationen/Wahnvorstellungen                                  | 353      |
| Allgemeine Schwäche                                                  | 007      | <b>Gastrointestinal (251-300)</b>            | <b>#</b> | Schlafstörung                                                      | 354      |
| Synkope/Präsynkope                                                   | 008      | Bauchschmerzen                               | 251      | Gewalttätiges Verhalten/Fremdgefährdung                            | 355      |
| Ödem, generalisiert                                                  | 009      | Appetitlosigkeit                             | 252      | Soziales Problem                                                   | 356      |
| Beinschwellung/Ödem                                                  | 010      | Verstopfung                                  | 253      | Sonderbares Verhalten                                              | 358      |
| Kühle, pulslose Extremität                                           | 011      | Durchfall                                    | 254      | Sorge um das Wohlergehen des Patienten                             | 359      |
| Eine Extremität gerötet, überwärmt                                   | 012      | Fremdkörper im Rektum                        | 255      | Kindliche Verhaltensauffälligkeit                                  | 360      |
| <b>HNO (Ohren) (051-100)</b>                                         | <b>#</b> | Leistenschmerzen/-schwellung                 | 256      | <b>Neurologisch (401-450)</b>                                      | <b>#</b> |
| Ohrenschmerzen                                                       | 051      | Übelkeit und/oder Erbrechen                  | 257      | Veränderter Bewusstseinszustand                                    | 401      |
| Fremdkörper im Ohr                                                   | 052      | Rektale/perineale Schmerzen                  | 258      | Verwirrtheit                                                       | 402      |
| Hörverlust                                                           | 053      | Bluterbrechen                                | 259      | Schwindel                                                          | 403      |
| Tinnitus                                                             | 054      | Perianaler Blutabgang/Teerstuhl              | 260      | Kopfschmerz                                                        | 404      |
| Ausfluss aus dem Ohr                                                 | 055      | Iktus                                        | 261      | Krampfanfall                                                       | 405      |
| Ohrverletzung                                                        | 056      | Schluckauf                                   | 262      | Gangstörung/Ataxie                                                 | 406      |
| <b>HNO (Mund, Rachen, Hals) (101-150)</b>                            | <b>#</b> | Abdominelle Raumforderung/gespanntes Abdomen | 263      | Kopfverletzung                                                     | 407      |
| Zahn-/Zahnfleischprobleme                                            | 101      | Trauma anal/rektal                           | 264      | Zittern                                                            | 408      |
| Trauma Gesicht                                                       | 102      | Fremdkörper oral/ösophageal                  | 265      | Schwäche in den Extremitäten/Symptome eines Schlaganfalls oder TIA | 409      |
| Halsschmerzen (wunder Rachen)                                        | 103      | Trinkstörung des Neugeborenen                | 266      | Sensibilitätsstörung/Parästhesie                                   | 410      |
| Halsschwellung/-schmerzen                                            | 104      | Neugeborenenikterus                          | 267      | Schlaffes Kind                                                     | 411      |
| Trauma Hals                                                          | 105      | <b>Urogenital (301-350)</b>                  | <b>#</b> | <b>Geburtshilfe/Gynäkologie (451-500)</b>                          | <b>#</b> |
| Schluckbeschwerden/Dysphagie                                         | 106      | Flankenschmerz                               | 301      | Menstruationsbeschwerden                                           | 451      |
| Schmerzen im Gesicht (nicht traumatisch, nicht dental)               | 107      | Hämaturie                                    | 302      | Fremdkörper in der Vagina                                          | 452      |
| <b>HNO (Nase) (151-200)</b>                                          | <b>#</b> | Genitaler Ausfluss/Läsion                    | 303      | Vaginaler Ausfluss                                                 | 453      |
| Nasenbluten                                                          | 151      | Penisschwellung                              | 304      | Sexueller Übergriff                                                | 454      |
| Verstopfte Nase/Heuschnupfen                                         | 152      | Skrotale Schmerzen und/oder Schwellung       | 305      | Vaginale Blutung                                                   | 455      |
| Fremdkörper in der Nase                                              | 153      | Harnverhalt                                  | 306      | Schamlippenschwellung                                              | 456      |
| Beschwerden eines Infektes der oberen Luftwege                       | 154      | Beschwerden eines Harnwegsinfektes           | 307      | Schwangerschaftsprobleme ≤ 20. SSW                                 | 457      |
| Trauma Nase                                                          | 155      | Oligurie                                     | 308      | Schwangerschaftsprobleme > 20. SSW                                 | 458      |

| Canadian Emergency Department Information System (CEDIS)             |          |                                                          |          |                                                                             |            |
|----------------------------------------------------------------------|----------|----------------------------------------------------------|----------|-----------------------------------------------------------------------------|------------|
| Liste der Vorstellungsgründe (V3.0)                                  |          |                                                          |          |                                                                             |            |
| Stand des Originals: April 2015, Stand der Übersetzung: Februar 2016 |          |                                                          |          |                                                                             |            |
| <b>Geburtshilfe/Gynäkologie (451-500) (Forts.)</b>                   | <b>#</b> | <b>Haut (701-750)</b>                                    | <b>#</b> | <b>Allgemeine und sonstige Beschwerden (851-900) (Forts.)</b>               | <b>#</b>   |
| Vaginale Schmerzen/<br>Schmerzen beim<br>Geschlechtsverkehr          | 460      | Biss                                                     | 701      | Direkte<br>Überweisung/Weiterleitung                                        | 855        |
| <b>Augenheilkunde (501-550)</b>                                      | <b>#</b> | Insektenstich                                            | 702      | Verbandswechsel                                                             | 856        |
| Exposition des Auges<br>gegenüber Chemikalien                        | 502      | Abschürfung                                              | 703      | Entfernung von<br>Klammern/Nähten                                           | 857        |
| Fremdkörper im Auge                                                  | 503      | Riss-/Quetsch-/Schnitt-/<br>Stichwunde                   | 704      | Gipskontrolle                                                               | 858        |
| Sehstörung                                                           | 504      | Verbrennung                                              | 705      | Bildgebung/Blutuntersuchung                                                 | 859        |
| Augenschmerzen                                                       | 505      | Kontakt mit Blut oder<br>Körperflüssigkeiten             | 706      | Problem mit Medizinprodukt                                                  | 860        |
| Rote Augen, Ausfluss aus dem<br>Auge                                 | 506      | Juckreiz                                                 | 707      | Verschreibung/Bedarf an<br>Medikamenten                                     | 861        |
| Lichtscheu                                                           | 507      | Hautausschlag                                            | 708      | Entfernung Ring                                                             | 862        |
| Doppelbilder                                                         | 508      | Lokalisierte Schwellung/Rötung                           | 709      | Auffällige Ergebnisse<br>Labor/Bildgebung                                   | 863        |
| Periorbitale Schwellung                                              | 509      | Wundkontrolle                                            | 710      | Blässe/Anämie                                                               | 864        |
| Trauma Auge                                                          | 510      | Sonstige Hautprobleme                                    | 711      | Postoperative Komplikationen                                                | 865        |
| Kontrolluntersuchung der Augen                                       | 511      | Schwellung/Beule/Schwiele                                | 712      | Geringfügige unspezifische<br>Beschwerden                                   | 866        |
| <b>Orthopädisch/Unfall-<br/>chirurgisch (551-600)</b>                | <b>#</b> | Rötung/Spannungsgefühl in der<br>Brust                   | 713      | Unstillbares Schreien                                                       | 867        |
| Rückenschmerzen                                                      | 551      | Ausschluss eines<br>Parasitenbefalls                     | 714      | Angeborene Probleme bei<br>Kindern                                          | 868        |
| Traumatische Rücken-/<br>Wirbelsäulenverletzung                      | 552      | Zyanose                                                  | 715      | Neugeborenes                                                                | 869        |
| Amputation                                                           | 553      | Spontane Hauteinblutungen                                | 716      | Intravenöse Therapie                                                        | 870        |
| Schmerzen obere Extremität                                           | 554      | Fremdkörper in der Haut                                  | 717      | <b>Patient aufgenommen und vor<br/>Ersteinschätzung wieder<br/>gegangen</b> | <b>998</b> |
| Schmerzen untere Extremität                                          | 555      | Nagelprobleme                                            | 718      | <b>Unbekannt</b>                                                            | <b>999</b> |
| Verletzung obere Extremität                                          | 556      | <b>Substanzmissbrauch (751-<br/>800)</b>                 | <b>#</b> |                                                                             |            |
| Verletzung untere Extremität                                         | 557      | Substanzmissbrauch/<br>Intoxikation                      | 751      |                                                                             |            |
| Gelenkschwellung                                                     | 558      | Einnahme einer Überdosierung                             | 752      |                                                                             |            |
| Kindliche Gangstörung/<br>Schmerzen beim Gehen                       | 559      | Substanzentzug                                           | 753      |                                                                             |            |
| <b>Respiratorisch (651-700)</b>                                      | <b>#</b> | <b>Trauma (801-850)</b>                                  | <b>#</b> |                                                                             |            |
| Luftnot                                                              | 651      | Schweres Trauma -<br>penetrierend                        | 801      |                                                                             |            |
| Atemstillstand                                                       | 652      | Schweres Trauma - stumpf                                 | 802      |                                                                             |            |
| Husten/Verschleimung                                                 | 653      | Isoliertes Thoraxtrauma -<br>penetrierend                | 803      |                                                                             |            |
| Hyperventilation                                                     | 654      | Isoliertes Thoraxtrauma - stumpf                         | 804      |                                                                             |            |
| Bluthusten                                                           | 655      | Isoliertes Abdominaltrauma -<br>penetrierend             | 805      |                                                                             |            |
| Fremdkörper in den Atemwegen                                         | 656      | Isoliertes Abdominaltrauma -<br>stumpf                   | 806      |                                                                             |            |
| Allergische Reaktion                                                 | 657      | <b>Allgemeine und sonstige<br/>Beschwerden (851-900)</b> | <b>#</b> |                                                                             |            |
| Stridor                                                              | 658      | Exposition gegenüber einer<br>übertragbaren Krankheit    | 851      |                                                                             |            |
| Giemen ohne weitere<br>Beschwerden                                   | 659      | Fieber                                                   | 852      |                                                                             |            |
| Apnoeanfälle bei Säuglingen                                          | 660      | Hyperglykämie                                            | 853      |                                                                             |            |
| Grippeähnliche Erkrankung                                            | 661      | Hypoglykämie                                             | 854      |                                                                             |            |
